# Supplementary material
Source: publisher figshare collection journal article supplement (https://geolsoc.figshare.com/ndownloader/files/5424602)
Supplement: Supplementary file 1 [file 5424602]

Table 2.
Sample	HEATING	COOLING
I.D.	TC	TC
RD108	579	578
RD122	578	579
RD131	575	578
RD15	578	579
RD25	588	590
RD32	577	579
RD99	579	580
